# Supplementary material
Source: Elsevier journal article supplement (https://rcastoragev2.blob.core.windows.net/5a270ae48236a5e99ddb9a839e60d5dc/mmc1.pdf)
Supplement: mmc1 [file mmc1.pdf]

# THE LANCET

## Global Health

### Supplementary appendix

This appendix formed part of the original submission and has been peer reviewed.  
We post it as supplied by the authors.

Supplement to: Meiring JE, Shakya M, Khanam F, et al. Burden of enteric fever at three urban sites in Africa and Asia: a multicentre population-based study. *Lancet Glob Health* 2021; **9**: e1688–96.

# Appendix

## Supplementary Methods

### Study Sites

Malawi is a low-income country in south-eastern Africa. In Malawi, the study was conducted in Ndirande, a large urban township on the outskirts of Blantyre. Ndirande is densely populated, with limited infrastructure and poor sanitation. It is served by one health clinic and the nearby government-funded referral hospital, where a high number of *S. Typhi* cases have previously been documented.

Nepal is a lower-middle-income country in the Himalayan region of South Asia. The study was conducted in Patan, which is within the Lalitpur Sub-Metropolitan City in the Kathmandu Valley. Most people live in overcrowded conditions and obtain their water from stone spouts or sunken wells. It is served by Patan Hospital, a large government-run hospital where approximately 400 culture-confirmed cases of enteric fever are diagnosed annually.

Bangladesh is a densely populated lower-middle-income country located near the Bay of Bengal. The study was carried out in Mirpur, which is located within the capital of Dhaka and served by both the International Centre for Diarrhoeal Disease Research, Bangladesh (icddr,b) main hospital and the Mirpur Treatment Centre. Most residents have access to municipal tap water, but water quality is poor. Previous studies have found a high incidence of blood-culture-confirmed typhoid fever in Dhaka, particularly among young children.

### Passive Surveillance

Participants were approached for enrolment to the passive surveillance component of the study if they had a history of fever for  $\geq 72$  hours, later changed to  $\geq 48$  hours or a recorded

temperature of  $>38^{\circ}\text{C}$ . This change in recruitment was made after approximately six months of surveillance with the objective of increasing the recruitment of febrile participants and capturing as many blood-culture positive enteric fever cases within the study surveillance to accurately determine the incidence of disease.

All three sites enrolled participants of all ages from both outpatient and inpatient facilities. Surveillance was performed for two years in all sites, covering at least two complete typhoid seasons. A case of enteric fever or invasive *Salmonellae* infection was defined as a participant from within the demographic census area, with blood-culture confirmed *Salmonellae* infection (*S. Typhi*, *S. Paratyphi A*, *B* and *C*, non-typhoidal *Salmonellae*).

Written informed consent/assent was provided prior to enrolment. Blood was collected from participants (3-7 ml in children, 5-13 ml in adults) with priority given to aerobic blood culture bottle inoculation and the remainder collected in an EDTA tube.

#### Quality Control at Site

In Dhaka, blood cultures were performed in the Clinical Microbiology Laboratory at International Centre of Diarrhoeal Disease Research, Bangladesh (icddr,b), which operates under strict International Organization for Standardization (ISO) guidelines with ISO certification. Quality control for serological identification, ATCC strain of *S. Typhimurium* was used. *E. coli* ATCC 25922 and *Pseudomonas aeruginosa* ATCC 27853 strains were used as the quality control strains for carrying out the antimicrobial susceptibility testing.

In Kathmandu, blood culture was performed in the Microbiology Laboratory of Patan Hospital, which operates under the SOP guidelines of the hospital. For quality control, ATCC 14028 *S. Typhimurium*, ATCC 25923 *Staphylococcus aureus* and ATCC 25922 *E. Coli* were used for the growth identification, antimicrobial susceptibility and serological testing.

In Blantyre, blood cultures were performed in the Malawi Liverpool Wellcome Trust Microbiology Laboratory, which operates under its own SOP guidance.

### Antimicrobial Resistance

A range of antimicrobials were tested for all isolated strains, but specifics varied depending on site and the antimicrobials available to clinical practitioners at the sites. For *S. Typhi*, multi-drug resistance (MDR) was defined as non-susceptibility to amoxicillin/ampicillin, chloramphenicol and co-trimoxazole. Bacteria found as part of the normal human skin and oral flora were defined as contaminants, including diphtheroids, bacilli, micrococci and coagulase-negative staphylococci.

### Estimation of adjusted typhoid fever incidence

To estimate the adjusted typhoid fever incidence from the observed incidence of blood-culture-confirmed cases, we accounted for three steps in the observation process: (1) blood culture sensitivity, (2) enrollment and blood culture collection, and (3) healthcare seeking for (typhoid) fever. Each adjustment factor was derived from a different source. A detailed description of the Bayesian statistical approach to estimating the adjusted incidence is provided in Phillips et al.<sup>1</sup>

We adjusted for blood culture sensitivity using a normal mixture model based on patient-specific information about blood-culture volume and prior antibiotic use, parameterized according to the relationships with blood culture sensitivity reported in Antillon et al.<sup>2</sup> This resulted in a bimodal distribution for blood culture sensitivity depending on the prevalence of prior antibiotic use.

The proportion of eligible individuals who sought care but did not receive a blood culture test was directly estimated from data collected during STRATAA and subsequent local vaccine trials conducted at each site by the Typhoid Vaccine Acceleration Consortium (TyVAC).<sup>3</sup> For the Asian sites (Kathmandu and Dhaka), we adjusted for the higher likelihood of typhoid fever among those who had blood collected for culturing, based on a previously published imputation model that estimated that individuals who had blood drawn for culturing were 1.87 times more likely to be blood-culture positive than individuals with missing data (given data on age, duration of fever, temperature at presentation, and suspected diagnosis).<sup>4</sup> In Blantyre, the primary reason individuals did not have blood drawn for culturing was due to staffing shortages relative to the large number of individuals presenting to the healthcare facility, such that it was not possible to enroll and collect a blood sample from all eligible participants. Therefore, we assumed that data from individuals who did not have blood collected for culturing in Blantyre was missing completely at random, and the adjustment factor was estimated directly from the observed proportion of eligible individuals who were sampled.

Adjustments for healthcare seeking were based on data from the healthcare utilisation surveys and varied depending on previously identified risk factors for enteric fever.<sup>5-7</sup> In preliminary analyses, we found no consistent associations between severity of fever, indicators of socioeconomic status, and self-reported healthcare seeking for fever across different age groups in the three sites. Since we are interested in estimating the probability of seeking care for typhoid fever, which may differ from the probability of seeking care for fever of any cause, we used a standardization approach in which we calculated a weighted average of the probability of seeking care for fever among those with and without a previously identified typhoid risk factor.<sup>1</sup> For Blantyre, the risk factor was soap available after

defecation; in Nepal, it was having a household latrine; and in Bangladesh, it was boiled drinking water.<sup>5-7</sup> Healthcare seeking for fever was slightly higher among those with the typhoid risk factor in Malawi, but lower among those with the risk factor in Bangladesh and Nepal. To assess the robustness of our adjustments to the number of individuals sampled in the healthcare utilization survey, we also compared estimates for models that sampled the same number of individuals to models that sampled more using simulated data.

### Sensitivity analysis

We additionally compared the adjusted estimates from our model to those from a simpler approach in which we assumed there was no variability in blood culture sensitivity due to prior antibiotic usage (i.e. sensitivity was normally distributed with a mean of 0.59 and standard deviation of 0.0255), there was no difference in typhoid risk between those who did or did not have blood collected for culturing (i.e. the same approach based on the enrollment fraction was used in Kathmandu and Dhaka as in Blantyre), and probability of seeking care for typhoid fever was the same as the self-reported probability of seeking care for fever in the HUS. This adjustment model and its sensitivity analyses are described in detail elsewhere.<sup>1</sup> Results are presented in Supplementary Table 7.

113

| Site                                            | Blantyre, Malawi | Kathmandu, Nepal | Dhaka, Bangladesh |
|-------------------------------------------------|------------------|------------------|-------------------|
| Total Households from Census 1                  | 22,364           | 24,405           | 26,119            |
| Households with at least one child (% of total) | 11,893 (53)      | 13,980 (57)      | 19,325 (74)       |
| Households enumerated (% of total)              | 1,131 (5)        | 1478 (6)         | 1198 (5)          |

114     Supplementary Table 1. Sampling frame for selection of households for the healthcare utilisation surveys.

115

116

117

118

119

120

121

122

123

| Census \ Site     | Blantyre, Malawi |        |        | Kathmandu, Nepal |          |        |        | Dhaka, Bangladesh |          |          |        |        |
|-------------------|------------------|--------|--------|------------------|----------|--------|--------|-------------------|----------|----------|--------|--------|
|                   | Baseline         | Final  | PYO    | Baseline         | Update 1 | Final  | PYO    | Baseline          | Update 1 | Update 2 | Final  | PYO    |
| Active Households | 22364            | 23826  |        | 24405            | 24897    | 22342  |        | 26119             | 26010    | 26281    | 26110  |        |
| Active Population | 97392            | 102242 | 199634 | 101810           | 102590   | 101021 | 203614 | 110731            | 111418   | 112830   | 110963 | 222971 |
| <b>Age Groups</b> |                  |        |        |                  |          |        |        |                   |          |          |        |        |
| 0-11 months       | 2492             | 4340   | 6832   | 1202             | 1618     | 1579   | 2932   | 2120              | 3087     | 3123     | 2861   | 5596   |
| 12-23 months      | 2426             | 3844   | 6270   | 1231             | 1205     | 1166   | 2402   | 2046              | 2138     | 2180     | 2138   | 4250   |
| 24-35 months      | 2412             | 2728   | 5140   | 1200             | 1198     | 1184   | 2388   | 2071              | 2121     | 2205     | 2177   | 4288   |
| 36-47 months      | 2717             | 2655   | 5372   | 1156             | 1169     | 1168   | 2328   | 2105              | 2082     | 2102     | 2104   | 4196   |
| 48-59 months      | 2626             | 2593   | 5220   | 1265             | 1259     | 1245   | 2512   | 2150              | 2072     | 2084     | 2082   | 2095   |
| 0-4yrs            | 12673            | 16160  | 28833  | 6054             | 6449     | 6342   | 12563  | 10492             | 11500    | 11694    | 11362  | 22524  |
| 5-9yrs            | 12784            | 12576  | 25360  | 6766             | 6763     | 6701   | 13487  | 10181             | 10164    | 10251    | 10225  | 20411  |
| 10-14yrs          | 12991            | 13214  | 26205  | 7569             | 7665     | 7522   | 15171  | 10617             | 10665    | 10653    | 10537  | 21236  |
| 15-29yrs          | 31893            | 34464  | 66357  | 33380            | 32558    | 31479  | 62635  | 36097             | 35666    | 35907    | 35422  | 71546  |
| 30-49yrs          | 21666            | 20996  | 42662  | 30954            | 31474    | 31524  | 62634  | 30376             | 30487    | 30686    | 30593  | 61071  |
| 50+yrs            | 5385             | 5213   | 10598  | 17087            | 17430    | 17453  | 34647  | 12968             | 12936    | 12971    | 12824  | 25850  |

124      Supplementary Table 2. Demographic Census and Census Updates for the three study sites. Abbreviations: PYO, Person-years of observation



| Site                        | Blantyre, Malawi | Kathmandu, Nepal | Dhaka, Bangladesh |
|-----------------------------|------------------|------------------|-------------------|
| <b>Bacteria</b>             |                  |                  |                   |
| E. Coli                     | 7                | 1                | 6                 |
| Streptococcus<br>Pneumoniae | 3                | 0                | 0                 |
| Salmonella<br>Enteritidis   | 1                | 0                | 0                 |
| Neisseria spp               | 1                | 0                | 0                 |
| Staphylococcus<br>aureus    | 0                | 3                | 0                 |
| Klebsiella<br>pneumoniae    | 0                | 2                | 3                 |
| Streptococcus spp           | 0                | 0                | 7                 |
| Enterococcus                | 0                | 0                | 5                 |
| Corynebacterium<br>spp.     | 0                | 0                | 3                 |
| Other                       | 0                | 0                | 11                |

125      Supplementary Table 3. Other pathogenic non-typhoidal bacteria isolated from blood culture.

126

127

128

129

130

| Site<br>Antimicrobial     | Blantyre, Malawi |                 |     | Kathmandu, Nepal |                 |     | Dhaka, Bangladesh |                 |    |
|---------------------------|------------------|-----------------|-----|------------------|-----------------|-----|-------------------|-----------------|----|
|                           | S. Typhi         |                 |     | S. Typhi         |                 |     | S. Typhi          |                 |    |
| No. of cases (% of total) | Susceptible      | Non-susceptible | NT  | Susceptible      | Non-susceptible | NT  | Susceptible       | Non-susceptible | NT |
| Ampicillin                | 3 (2)            | 152 (98)        | 11  | 154 (99)         | 1 (1)           | 4   | 203 (57)          | 155 (43)        | 1  |
| Chloramphenicol           | 3 (2)            | 163 (98)        | 0   | 149 (99)         | 2 (1)           | 8   | 188 (52)          | 167 (48)        | 4  |
| Cotrimoxazole             | 3 (2)            | 163 (98)        | 0   | 150 (99)         | 2 (1)           | 7   | 190 (53)          | 168 (47)        | 1  |
| MDR                       |                  | 152 (92)        |     |                  | 1 (1)           |     |                   | 140 (39)        |    |
| Amikacin                  | 1 (100)          | 0 (0)           | 165 | 10 (91)          | 1 (9)           | 148 | 357 (99.5)        | 1 (0.5)         | 1  |
| Amoxiclav                 | 1 (100)          | 0 (0)           | 165 | NA               | NA              | NA  | 321 (90)          | 35 (10)         | 3  |
| Azithromycin              | NA               | NA              | NA  | 140 (93)         | 10 (7)          | 9   | 348 (97)          | 11 (3)          | 0  |
| Cefixime                  | NA               | NA              | NA  | NA               | NA              | NA  | 359 (100)         | 0 (0)           | 0  |
| Ceftriaxone               | 166 (100)        | 0 (0)           | 0   | 150 (100)        | 0 (0)           | 4   | 359 (100)         | 0 (0)           | 0  |
| Ciprofloxacin             | 166 (100)        | 0 (0)           | 0   | 26 (17)          | 127 (83)        | 6   | 4 (1)             | 355 (99)        | 0  |
| Nalidixic Acid            | NA               | NA              | NA  | 19 (15)          | 134 (85)        | 6   | 15 (4)            | 344 (96)        | 0  |
| Meropenem                 | NA               | NA              | NA  | NA               | NA              | NA  | 356 (99.5)        | 0 (0.5)         | 3  |
|                           | S. Typhimurium   |                 |     | S. Paratyphi     |                 |     | S. Paratyphi      |                 |    |
| Ampicillin                | 22 (65)          | 12 (35)         | 2   | 14 (100)         | 0 (0)           | 0   | 95 (100)          | 0 (0)           | 0  |
| Chloramphenicol           | 26 (72)          | 10 (28)         | 0   | 13 (100)         | 0 (0)           | 1   | 95 (100)          | 0 (0)           | 0  |
| Cotrimoxazole             | 23 (64)          | 13 (36)         | 0   | 14 (100)         | 0 (0)           | 0   | 95 (100)          | 0 (0)           | 0  |
| MDR                       |                  | 10 (28)         |     |                  |                 |     |                   |                 |    |
| Amikacin                  | NA               | NA              | NA  | 1 (100)          | 0 (0)           | 13  | 0 (0)             | 0 (0)           | 95 |
| Amoxiclav                 | NA               | NA              | NA  | NA               | NA              | NA  | 93 (98)           | 2 (2)           | 0  |
| Azithromycin              | NA               | NA              | NA  | 10 (70)          | 4 (30)          | 0   | 54 (57)           | 41 (43)         | 0  |
| Cefixime                  | NA               | NA              | NA  | NA               | NA              | NA  | 94 (100)          | 0 (0)           | 1  |
| Ceftriaxone               | 36 (100)         | 0 (0)           | 0   | 4 (100)          | 0 (0)           | 10  | 95 (100)          | 0 (0)           | 0  |
| Ciprofloxacin             | 27 (100)         | 0 (0)           | 0   | 0 (0)            | 14 (100)        | 0   | 1 (1)             | 94 (99)         | 0  |
| Nalidixic Acid            | NA               | NA              | NA  | 2 (15)           | 12 (85)         |     | 0 (0)             | 95 (100)        | 0  |
| Meropenem                 | NA               | NA              | NA  | NA               | NA              | NA  | 93 (100)          | 0 (0)           | 2  |

Supplementary Table 4. Antimicrobial resistance patterns for S. Typhi, S. Paratyphi A and S. Typhimurium. No cases of blood-culture confirmed S. Paratyphi A were identified in Blantyre and no cases of blood-culture confirmed S. Typhimurium were identified from either Kathmandu or Dhaka.

134 Abbreviations: NT, Not Tested; MDR, multi-drug resistance

|                   | Site     | Blantyre, Malawi |                |                        | Kathmandu, Nepal |                 |                        | Dhaka, Bangladesh |                  |                        |
|-------------------|----------|------------------|----------------|------------------------|------------------|-----------------|------------------------|-------------------|------------------|------------------------|
|                   |          | S. Typhi         | S. Typhimurium | Blood Culture Negative | S. Typhi         | S. Paratyphi    | Blood Culture Negative | S. Typhi          | S. Paratyphi     | Blood Culture Negative |
| <b>HR (bpm)</b>   |          |                  |                |                        |                  |                 |                        |                   |                  |                        |
|                   | <1yr     | NA               | 115            | 132 (120-145)          | 124 (124-124)    | NA              | 124 (115-136)          | 90 (89-93) *      | 110 (110-110)    | 100 (95-107)           |
|                   | 1-2yrs   | 120 (120-120)    | 120 (87-126)   | 130 (115-145)          | 90 (90-90)       | NA              | 120 (109-133)          | 98 (91-100)       | 85 (85-85) ^     | 97 (90-100)            |
|                   | 2-5yrs   | 120 (106-128)    | 116 (106-128)  | 128 (115-141)          | 118 (108-149)    | NA              | 120 (100-130)          | 92 (88-98)        | 92 (89-96)       | 92 (88-98)             |
|                   | 5-12yrs  | 120 (101-122)    | 104 (104-104)  | 120 (103-130)          | 100 (86-108) *   | 124 (115-133) ^ | 104 (94-120)           | 86 (82-90)        | 88 (84-90)       | 86 (82-90)             |
|                   | >12yrs   | 105 (96-120) *   | NA (86-90)     | 100 (88-114)           | 92 (84-100)      | 89 (86-90)      | 90 (80-100)            | 76 (74-80) *      | 78 (74-78)       | 76 (72-80)             |
| <b>SBP (mmHg)</b> |          |                  |                |                        |                  |                 |                        |                   |                  |                        |
|                   | <1yr     | NA               | NA             | NA                     | NA               | NA              | 100 (90-140)           | 75 (73-80)        | 75 (75-75)       | 80 (75-85)             |
|                   | 1-2yrs   | NA               | NA             | NA                     | NA               | NA              | 120 (109-133)          | 80 (75-85)        | 75 (75-75)       | 80 (72.5-87.5)         |
|                   | 2-5yrs   | NA               | NA             | NA                     | 86 (86-86)       | NA              | 120 (100-130)          | 85 (80-85)        | 85 (76-88)       | 85 (75-90)             |
|                   | 5-12yrs  | NA               | NA             | NA                     | 90 (90-100)      | 90 (90-90)      | 100 (90-110)           | 90 (88-95)        | 90 (88-95) ^     | 90 (85-95) §           |
|                   | >12yrs   | 111 (103-120)    | NA             | 117 (105-129)          | 100 (100-110) *  | 110 (105-113)   | 110 (100-110)          | 110 (100-110)     | 110 (100-110) ^  | 110 (100-120)          |
| <b>MUAC (cm)</b>  |          |                  |                |                        |                  |                 |                        |                   |                  |                        |
|                   | <1yr     | NA               | 13 (13)        | 14 (13-15)             | NA               | NA              | NA                     | 13.6 (13.4-13.9)  | 13.3 (13.3-13.3) | 13.7 (13-14.3)         |
|                   | 1-4yrs   | 15 (14-16)       | 14.3 (13-16)   | 15 (14-16)             | NA               | NA              | NA                     | 14.5 (13.6-15.3)  | 14.3(13.4-15.2)  | 14.4 (13.5-15)         |
|                   | 5-9yrs   | 16 (15-16.5)     | 17 (17)        | 15.5 (10-16.5)         | NA               | NA              | NA                     | 15.8 (14.9-17.2)  | 15.8 (15-17)     | 15.9 (14.6-            |
|                   | 10-14yrs | 18.2 (15.5-19.1) | NA             | NA                     | NA               | NA              | NA                     | 19.7 (17.4-21.8)  | 19.6 (17.5-20.4) | 19.5 (17.9-            |

135 Supplementary Table 5. Physical characteristics of enrolled participants. Values in parentheses represent the 25<sup>th</sup> and 75<sup>th</sup> percentiles.

136 Abbreviations; HR, Heart Rate; bpm, beats per minute; SBP, Systolic blood pressure; mmHg, millimetres of mercury; MUAC, mid-upper arm  
 137 circumference; ml, millilitres

138

139 \*S. Typhi – BC Negative p-value < 0.05

140 ^ S. Typhi – S. Paratyphi p-value <0.05

141 § S. Paratyphi – BC Negative <0.05

| Age \ Site | Blantyre, Malawi      |            |                        | Kathmandu, Nepal    |            |                        | Dhaka, Bangladesh   |            |                        |
|------------|-----------------------|------------|------------------------|---------------------|------------|------------------------|---------------------|------------|------------------------|
|            | Crude cases           | Population | Unadjusted IR (95% CI) | Crude cases         | Population | Unadjusted IR (95% CI) | Crude cases         | Population | Unadjusted IR (95% CI) |
| Age        | <i>S. Typhi</i>       |            |                        | <i>S. Typhi</i>     |            |                        | <i>S. Typhi</i>     |            |                        |
| 0-11mnths  | 1                     | 3416       | 20 (1-112)             | 1                   | 1466       | 34 (1-190)             | 3                   | 2798       | 54 (11-157)            |
| 12-23mnths | 1                     | 3135       | 20 (1-115)             | 1                   | 1201       | 42 (1-232)             | 14                  | 2125       | 329 (180-553)          |
| 24-35mnths | 6                     | 2570       | 124 (46-271)           | 1                   | 1194       | 41 (1-233)             | 24                  | 2144       | 560 (359-833)          |
| 36-47mnths | 6                     | 2686       | 110 (41-240)           | 2                   | 1164       | 86 (10-310)            | 27                  | 2098       | 643 (424-936)          |
| 48-59mnths | 10                    | 2610       | 190 (91-350)           | 4                   | 1256       | 159 (43-408)           | 26                  | 2097       | 620 (405-908)          |
| 0-4yrs     | 24                    | 14417      | 83 (53-124)            | 9                   | 6282       | 72 (33-136)            | 94                  | 11262      | 417 (337-511)          |
| 5-9yrs     | 37                    | 12680      | 146 (103-201)          | 46                  | 6743       | 341 (250-455)          | 113                 | 10205      | 554 (456-666)          |
| 10-14yrs   | 23                    | 13103      | 88 (56-132)            | 27                  | 7585       | 178 (117-259)          | 57                  | 10618      | 268 (203-348)          |
| 15-29yrs   | 21                    | 33179      | 32 (20-48)             | 60                  | 32472      | 92 (71-119)            | 70                  | 35773      | 98 (76-124)            |
| 30+yrs     | 11                    | 26630      | 21 (10-37)             | 6                   | 48640      | 6 (2-13)               | 25                  | 43460      | 29 (19-42)             |
|            | <i>S. Typhimurium</i> |            |                        | <i>S. Paratyphi</i> |            |                        | <i>S. Paratyphi</i> |            |                        |
| 0-11mnths  | 4                     | 3416       | 80 (22-205)            | 0                   | 1466       | 0 (0-126)              | 0                   | 2798       | 0 (0-66)               |
| 12-23mnths | 6                     | 3135       | 124 (45-269)           | 0                   | 1201       | 0 (0-154)              | 1                   | 2125       | 24 (1-131)             |
| 24-35mnths | 2                     | 2570       | 41 (5-150)             | 0                   | 1194       | 0 (0-154)              | 4                   | 2144       | 93 (25-239)            |
| 36-47mnths | 1                     | 2686       | 18 (0-103)             | 1                   | 1164       | 43 (1-239)             | 3                   | 2098       | 71 (15-209)            |
| 48-59mnths | 2                     | 2610       | 38 (5-138)             | 0                   | 1256       | 40 (1-222)             | 4                   | 2097       | 95 (26-244)            |
| 0-4yrs     | 15                    | 14417      | 52 (29-86)             | 1                   | 6282       | 8 (0-44)               | 12                  | 11262      | 53 (28-93)             |
| 5-9yrs     | 1                     | 12680      | 4 (0-22)               | 5                   | 6743       | 37 (12-87)             | 24                  | 10205      | 117 (75-175)           |
| 10-14yrs   | 0                     | 13103      | 0 (0-14)               | 3                   | 7585       | 20 (4-58)              | 15                  | 10618      | 71 (40-117)            |
| 15-29yrs   | 0                     | 33179      | 0 (0-6)                | 2                   | 32472      | 3 (0-11)               | 33                  | 35773      | 46 (32-65)             |
| 30+yrs     | 0                     | 26630      | 0 (0-7)                | 2                   | 48640      | 2 (0-7)                | 11                  | 43460      | 13 (6-23)              |

142 Supplementary Table 6. Incidence Estimates. Crude cases were collected over a 24-month period, with denominator population calculated  
143 through demographic census and census update as outlined in Table2. Unadjusted incidence rates are per 100,000 person-years of observation.  
144 Abbreviations IR, Incidence rate; CI, Confidence Interval  
145

146

147

| Blantyre, Malawi |                     |                         |                        | Katrhamdu, Nepal    |                         |                        | Dhaka, Bangladesh   |                         |                        |
|------------------|---------------------|-------------------------|------------------------|---------------------|-------------------------|------------------------|---------------------|-------------------------|------------------------|
|                  | Seroconversion Rate | 95% Confidence Interval | Denominator Population | Seroconversion Rate | 95% Confidence Interval | Denominator Population | Seroconversion Rate | 95% Confidence Interval | Denominator Population |
| Age Groups       |                     |                         |                        |                     |                         |                        |                     |                         |                        |
| 0-4 years        | 2868                | 1153-5911               | 841                    | 7813                | 2537-18232              | 220                    | 3401                | 1904-5610               | 1915                   |
| 5-9 years        | 1205                | 146-4352                | 574                    | 5217                | 1915-11356              | 398                    | 3435                | 1571-6520               | 1136                   |
| 10-14 years      | 3065                | 631-8946                | 337                    | 8910                | 4075-16916              | 348                    | 598                 | 15-3336                 | 724                    |
| 15-29 years      | 3774                | 1384-8213               | 549                    | 10169               | 5255-17764              | 407                    | 5309                | 2744-9275               | 980                    |
| 30+ years        | 2076                | 762-4518                | 995                    | 7322                | 5100-10183              | 1646                   | 2988                | 1672-4928               | 2180                   |
| All Ages         |                     |                         |                        |                     |                         |                        |                     |                         |                        |
|                  | 2505                | 1605-3727               | 3296                   | 7631                | 5913-9691               | 3023                   | 3256                | 2432-4270               | 6935                   |

149    Supplementary Table 7: Seroconversion rates calculated using anti-Vi IgG antibody from the serological survey. Visits occurred approximately 3  
 150    months apart. Seroconversion was defined as a change of two-fold rise in anti-Vi IgG plus an absolute value of 50 EU/ml in the second sample.  
 151

|                   | Blantyre, Malawi        |                         |                              | Kathmandu, Nepal        |                      |                              | Dhaka, Bangladesh       |                      |                              |
|-------------------|-------------------------|-------------------------|------------------------------|-------------------------|----------------------|------------------------------|-------------------------|----------------------|------------------------------|
|                   | Crude rates<br>(95% CI) | Full model (95%<br>CrI) | Simple approach<br>(95% CrI) | Crude rates<br>(95% CI) | Full model (95% CrI) | Simple approach (95%<br>CrI) | Crude rates<br>(95% CI) | Full model (95% CrI) | Simple approach<br>(95% CrI) |
| <b>Age Groups</b> |                         |                         |                              |                         |                      |                              |                         |                      |                              |
| 0-4 years         | 83 (53-124)             | 632 (398-965)           | 588 (370-901)                | 72 (33-136)             | 764 (307-1,921)      | 681 (300-1,414)              | 417 (337-511)           | 2,625 (1,764-4,244)  | 2,141 (1,556-3,002)          |
| 5-9 years         | 146 (103-201)           | 861 (599-1203)          | 807 (556-1,1143)             | 341 (250-455)           | 6,713 (3,085-18,730) | 5,692 (2,950-12,963)         | 554 (456-666)           | 3,228 (2,276-4,757)  | 3,128 (2,317-4,296)          |
| 10-14 years       | 88 (56-132)             | 602 (377-915)           | 567 (353-869)                | 191 (128-275)           | 3,750 (1,653-10,559) | 3,153 (1,561-7,341)          | 268 (203-348)           | 1,564 (1,050-2,384)  | 1,511 (1,056-2,171)          |
| 15-29 years       | 32 (20-48)              | 361 (219-567)           | 389 (234-614)                | 92 (71-119)             | 1,457 (684-3,918)    | 1,206 (648-2,541)            | 98 (76-124)             | 956 (603-1,635)      | 781 (541-1,145)              |
| 30+ years         | 21 (10-37)              | 248 (124-447)           | 266 (133-484)                | 6 (2-13)                | 92 (29-301)          | 76 (26-211)                  | 29 (19-42)              | 279 (157-514)        | 227 (138-368)                |
| <b>All Ages</b>   |                         |                         |                              |                         |                      |                              |                         |                      |                              |
|                   | 58 (48-70)              | 444 (347-717)           | 423 (339-526)                | 74 (62-87)              | 1,062 (683-1,839)    | 915 (661-1,308)              | 161 (145-179)           | 1,135 (898-1,480)    | 1,008 (830-1,232)            |

Supplementary Table 8: Adjusted incidence rates of typhoid fever by site and age comparing the full model to a simpler approach. Rates are per 100,000 person-years of observation. Abbreviations: CI, confidence interval; CrI, credible interval.

Blantyre, Malawi

Kathmandu, Nepal

Dhaka, Bangladesh

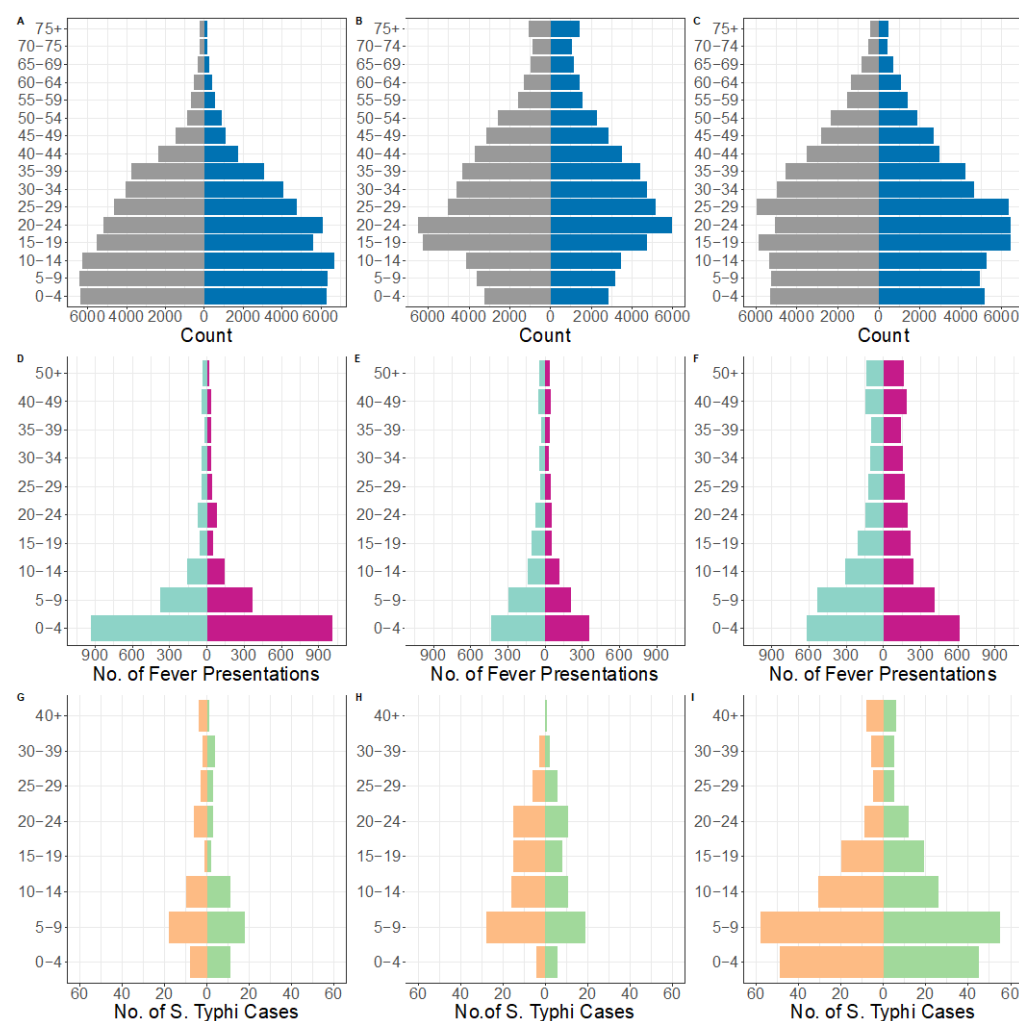

166

167 Supplementary Figure 1: Number of study participants by age and sex. (A-C) The total number of individuals enumerated in the demographic  
 168 census is plotted by 5-year age group for males (grey, left) and females (blue, right). (D-F) The number of individuals presenting with fever at  
 169 health facilities is plotted by age group for males (teal, left) and females (magenta, right). (G-I) Cases of blood-culture-confirmed *S. Typhi*  
 170 infection is plotted by age group for males (orange, left) and females (green, right) for the three study sites.

171

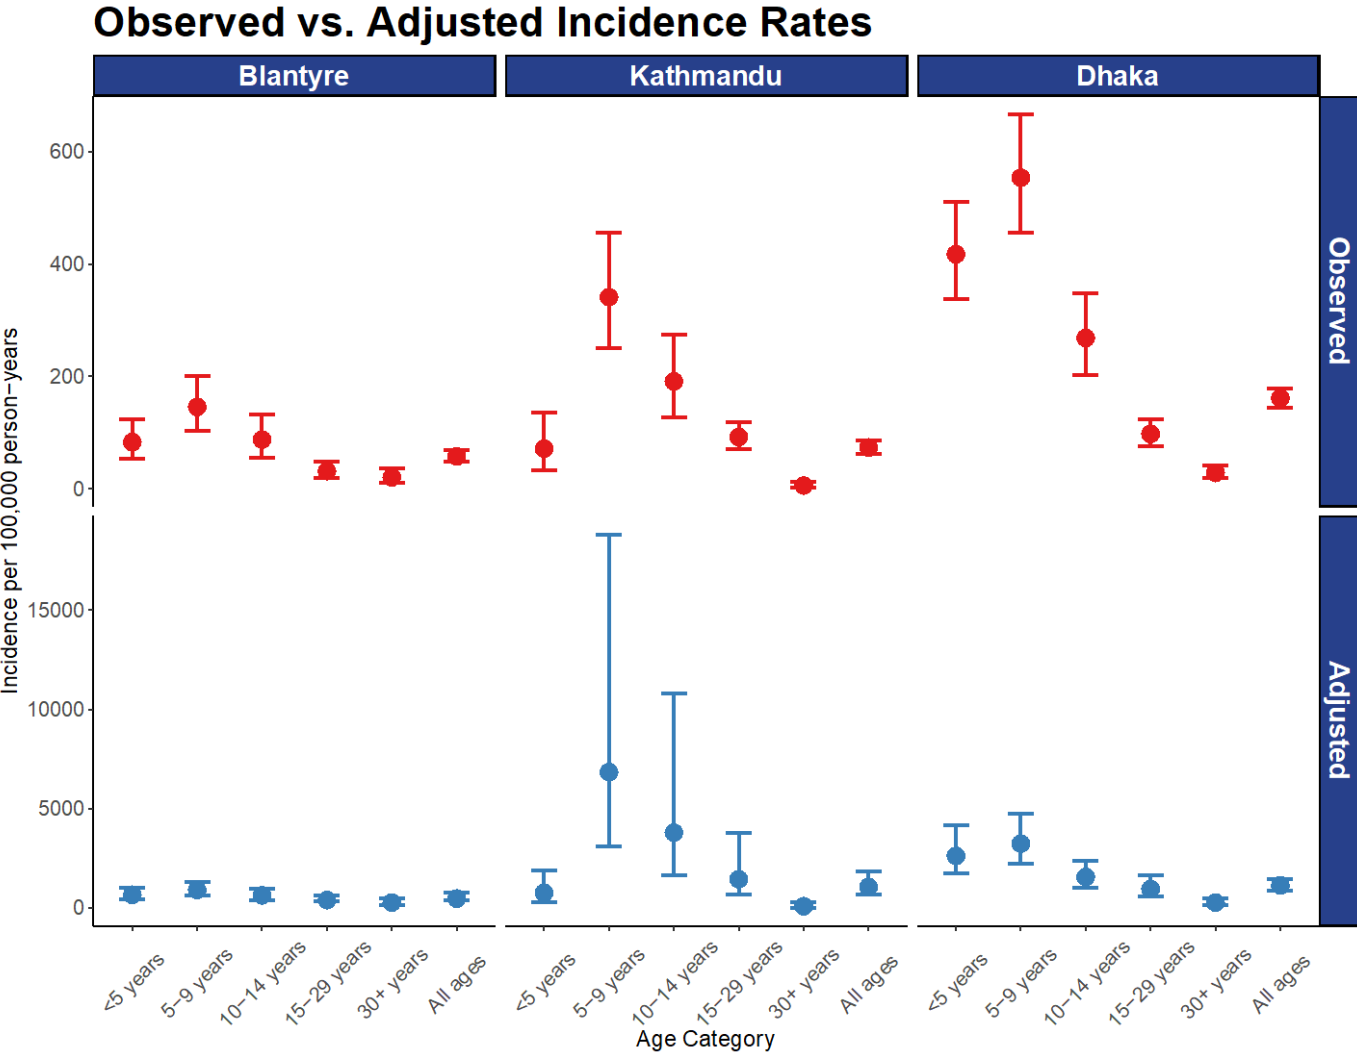

172

173     Supplementary Figure 2. Observed and adjusted incidence rates of typhoid fever across three age groups for the three study sites.



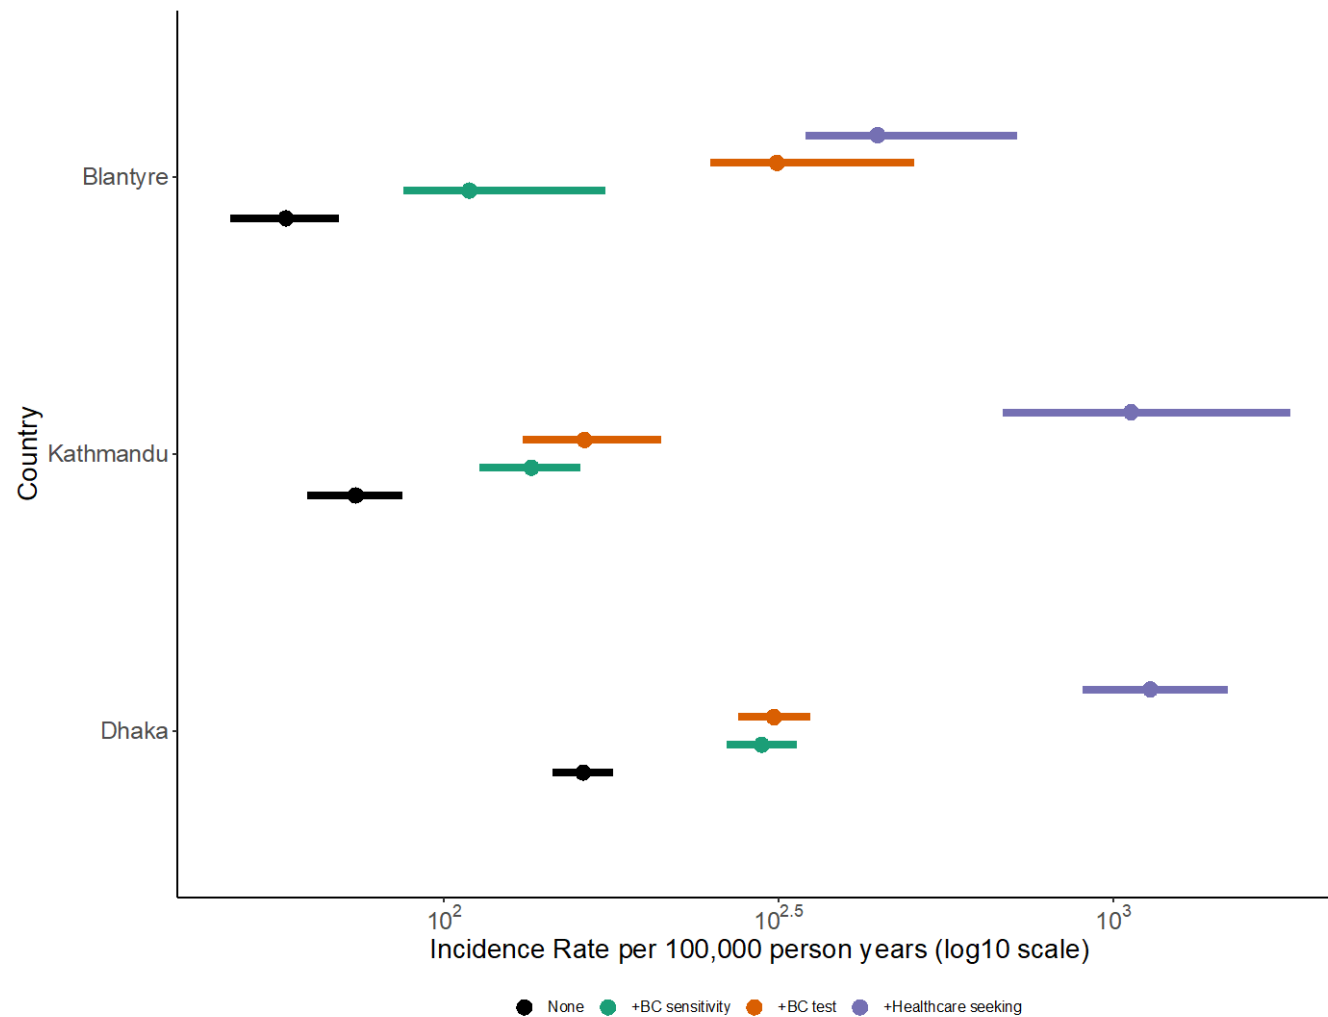

174

175 Supplementary Figure 3. Adjustments made to estimate the incidence of typhoid fever across the three study sites. The observed crude  
 176 incidence of blood-culture-confirmed cases of *S. Typhi* (black) was adjusted incrementally for blood culture sensitivity (green), the probability of  
 177 being enrolled and receiving a blood culture (orange), and probability of seeking healthcare (purple).

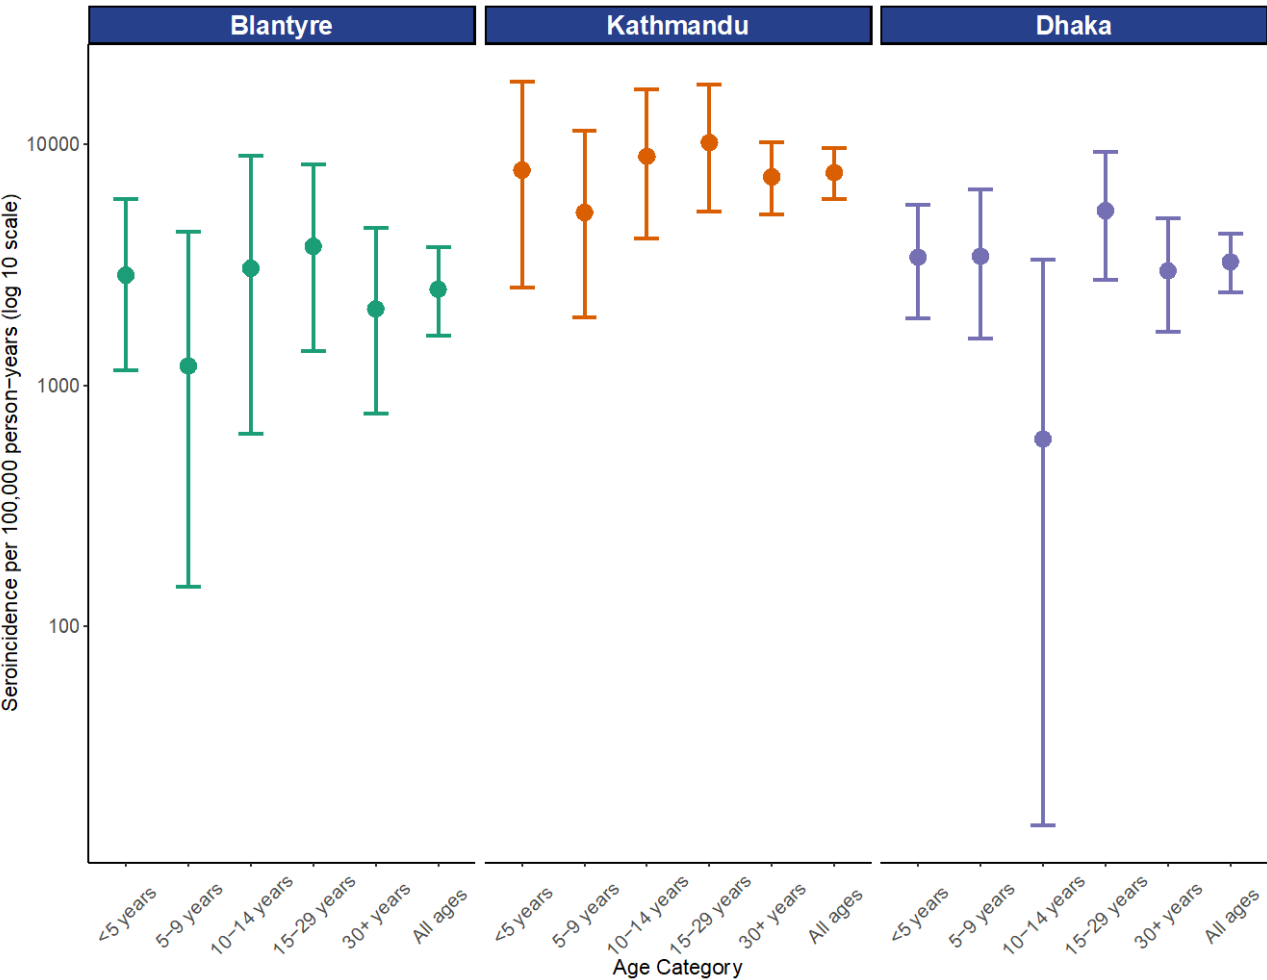

179

180

181 Supplementary Figure 3: Seroincidence estimates of *S. Typhi* exposure. Seroincidence was calculated based on data from the serological survey,  
182 with randomly selected participants sampled approximately 3 months apart. Seroconversion was defined as a 2-fold rise in anti-Vi IgG antibody,  
183 plus an absolute value of 50 EU/ml in the second sample.

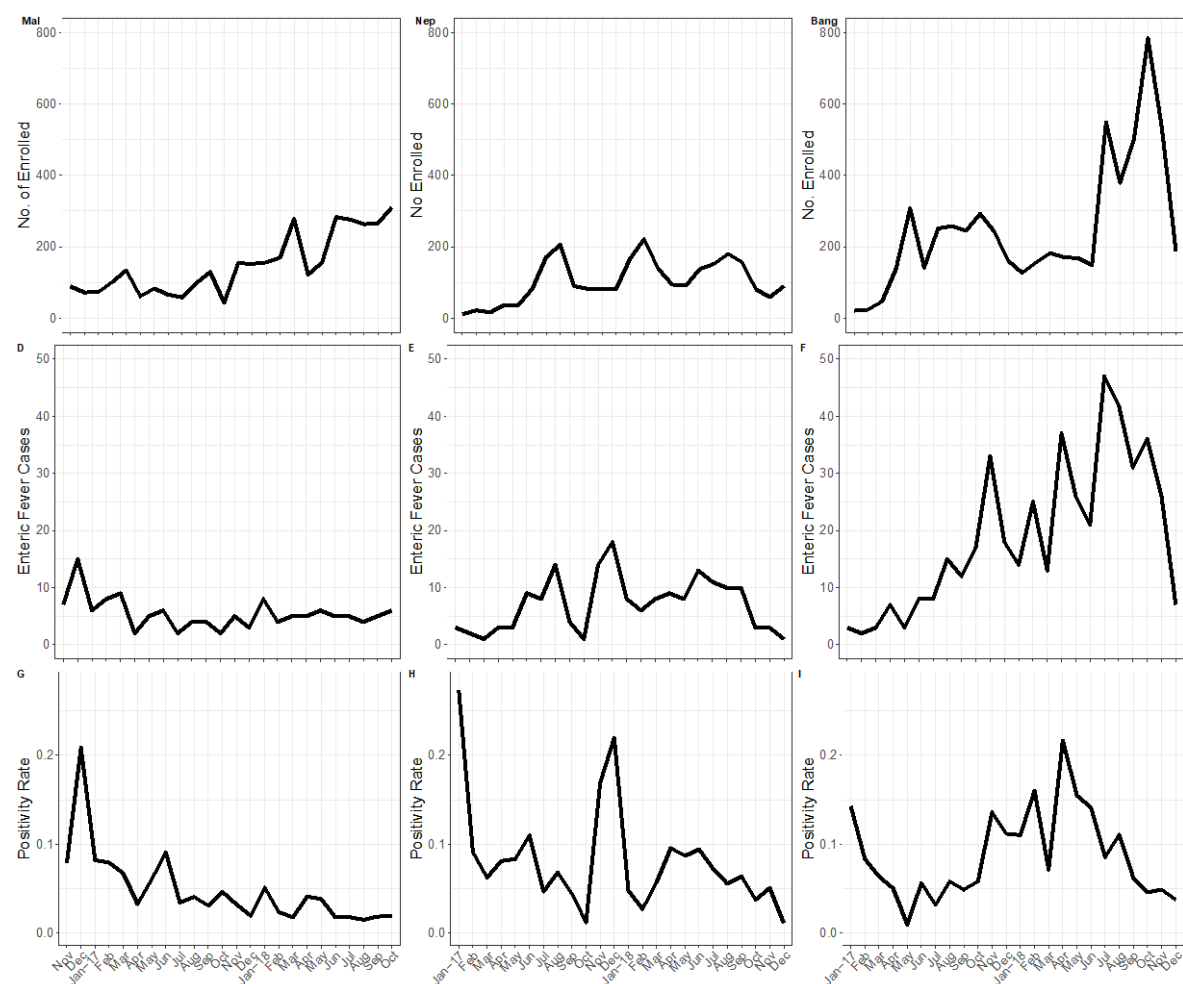

184  
185

186 Supplementary Figure 4. Numbers of participants enrolled (row1), *S. Typhi* positive (row2), and positivity rate of blood cultures across a two-year  
187 period for Blantyre (column 1), Kathmandu (column 2) and Dhaka (column 3). Grey bars indicate rainy seasons across the three sites. In all three  
188 sites, recruitment of eligible individuals increased over the two-year period with an increase in recruitment as expected during the rainy seasons.



190

- 191 1. Phillips, M. T. *et al.* Title: A Bayesian approach for estimating typhoid fever incidence  
192 from large-scale facility-based passive surveillance data. *medRxiv*  
193 2020.10.05.20206938 (2020). doi:10.1101/2020.10.05.20206938
- 194 2. Antillon, M., Saad, N. J., Baker, S., Pollard, A. J. & Pitzer, V. E. The Relationship Between  
195 Blood Sample Volume and Diagnostic Sensitivity of Blood Culture for Typhoid and  
196 Paratyphoid Fever: A Systematic Review and Meta-Analysis. *J. Infect. Dis.* **218**, S255–  
197 S267 (2018).
- 198 3. Meiring, J. E. *et al.* The Typhoid Vaccine Acceleration Consortium (TyVAC): Vaccine  
199 effectiveness study designs: Accelerating the introduction of typhoid conjugate  
200 vaccines and reducing the global burden of enteric fever. Report from a meeting held  
201 on 26–27 October 2016, Oxford. *Vaccine* **35**, 5081–5088 (2017).
- 202 4. Voysey, M. *et al.* Under-detection of blood culture-positive enteric fever cases: The  
203 impact of missing data and methods for adjusting incidence estimates. *PLoS Negl.*  
204 *Trop. Dis.* **14**, e0007805 (2020).
- 205 5. Gauld, J. S. *et al.* Domestic river water use and risk of typhoid fever: results from a  
206 case-control study in Blantyre, Malawi. *Clin. Infect. Dis.* (2019). doi:10.1093/cid/ciz405
- 207 6. Karkey, A. *et al.* Differential Epidemiology of Salmonella Typhi and Paratyphi A in  
208 Kathmandu, Nepal: A Matched Case Control Investigation in a Highly Endemic Enteric  
209 Fever Setting. *PLoS Negl. Trop. Dis.* **7**, e2391 (2013).
- 210 7. Ram, P. K. *et al.* Risk factors for typhoid fever in a slum in Dhaka, Bangladesh.  
211 *Epidemiol. Infect.* **135**, 458–65 (2007).

212
